# Supplementary material for: Development and Validation of a Machine Learning–Based Model of Mortality Risk in First-Episode Psychosis
Source: PubMed Central journal article supplement (PMC10949098; doi:10.1001/jamanetworkopen.2024.0640), 2024-03-18
Supplement: jamanetwopen-e240640-s001.pdf [file jamanetwopen-e240640-s001.pdf]

## Supplementary Online Content

Lieslehto J, Tiihonen J, Lähteenvuo M, et al. Development and validation of a machine learning–based model of mortality risk in first-episode psychosis. *JAMA Netw Open*. 2024;7(3):e240640. doi:10.1001/jamanetworkopen.2024.0640

### **eMethods.**

**eTable 1.** Variables Used for Training the Machine Learning Model to Predict Death Within 2 Years After First-Episode Psychosis (FEP) Diagnosis and Their Corresponding Importance (Gain) to the Model

**eTable 2.** Machine Learning Classification Performances for the Prediction of Mortality Across the Study Samples

**eTable 3.** Differences in the Patterns of Use of Different Oral Antipsychotics and Long-Acting Injectable Antipsychotics (LAIs; Grouped Together) Among Those Predicted to Die and to Survive in the Discovery Sample

**eTable 4.** Association Between Use vs Nonuse of Medications and Risk of Death in Between-Individual Analysis in the Swedish Discovery Sample (n = 20 000)

**eFigure 1.** Flowchart Depicting the Model Development and Validation Analyses in the Present Study

**eFigure 2.** Proportion of Correct Out-of-Training Predictions Among Different Causes of Death in the Discovery Sample

**eFigure 3.** Calibration Plots for the Model Predictions in the 2 Validation Samples

**eFigure 4.** Association of Different Pharmacotherapies and the Risk of Death in the Discovery Sample (n = 20 000) Without Machine Learning–Based Stratification

This supplementary material has been provided by the authors to give readers additional information about their work.

## eMethods.

### 1.1. Datasets

We identified the Swedish cohort using data from the National Patient Register (inpatient and specialized outpatient care) and the MiDAS Register (disability pensions and sickness absence). In the Swedish cohort, we utilized the following registers: the National Patient Register (all hospital care periods and specialized outpatient visits with diagnoses from July 2005 to December 2021), the Prescribed Drug Register (prescription drug purchases from July 2005 to December 2021), the Causes of Death Register (causes of death from 2006 to 2021), and the LISA register (demographic characteristics).

The Finnish cohort was identified from the Hospital Discharge Register maintained by the National Institute of Health and Welfare. Data for the Finnish cohort were collected from the Hospital Discharge Register (all hospital care periods with diagnoses from 1972 to 2017), the Prescription Register (reimbursed prescription drug purchases from 1995 to 2017), and the Causes of Death Register from Statistics Finland (1972–2017).

### 1.2. Machine Learning Pipeline

We used XGBoost (<https://xgboost.ai/about>) to train our model in the discovery sample using all available 51 variables. None of the variables used for training the model had over 20% missing values, and none of the participants had >40% missing values. We did not impute missing values due to XGBoost's ability to handle missing values. We trained the model within a nested cross-validation framework (eFigure 1). Nested cross-validation is a technique used to evaluate a machine learning model's out-of-training performance while also tuning the hyperparameters. In this method, there are two levels of cross-validation: the outer loop splits (10 folds, five permutations) the data into training and testing sets, and the inner loop selects the best hyperparameters (i.e., hyperparameter tuning, three folds). Nested cross-validation helps avoid overfitting and provides an accurate estimate of the model's generalizability. We tuned the following hyperparameters: eta/learning\_rate ( $2^{-8}$ ,  $2^{-6}$ ,  $2^{-4}$ ,  $2^{-2}$ ), gamma/min\_split\_loss ( $2^{-16}$ ,  $2^{-6}$ ,  $2^2$ ), max\_depth (3,5,7), the number of decision trees (100, 300, 500) and min\_child\_weight ( $2^{-16}$ ,  $2^{-6}$ ,  $2^4$ ,  $2^8$ ). These hyperparameters were optimized using grid search and by employing maximal balanced accuracy (i.e., an average of sensitivity and specificity) as a selection criterion within the nested cross-validation framework. We set subsample and colsample\_bytree parameters as 0.5. Also, we set scale\_pos\_weight as the ratio of actual deaths and survivals over the follow-up in the discovery sample to counteract class imbalance that could lead to imbalanced predictions. Other hyperparameters were left default. Model significance was assessed by comparing observed performance (i.e., AUROC) with predictions based on 5,000 random label permutations of the outcome label (i.e., mortality within two years).

We determined variable importance by calculating its feature gain, which measures the fractional contribution of each variable (feature) to the model. The higher the gain for a variable, the more critical it is for the model's prediction. Each variable's average gain in the discovery sample is provided in eTable 2.

We then aimed to identify a small set of the most relevant variables. For this purpose, we retrained another XGBoost model in the Swedish discovery sample using only the top 10% most important (i.e., five) variables. The hyperparameter tuning was again conducted within the cross-validation framework as described above. We then applied the model to independent Swedish and Finnish validation samples.

We visualized the variable contribution to this parsimonious model using SHAP (SHapley Additive exPlanations), a game-theoretic approach that facilitates the explanation of machine learning model predictions. SHAP works by calculating the "importance" of each feature, taking into account the magnitude of the effect and the interaction between features. It then uses game theory to allocate the contribution (positive or negative) of each feature to the final prediction.

**eTable 1.** Variables Used for Training the Machine Learning Model to Predict Death Within 2 Years After First-Episode Psychosis (FEP) Diagnosis and Their Corresponding Importance (Gain) to the Model

| Variable Name                                                                                                                            | Importance (Gain) |
|------------------------------------------------------------------------------------------------------------------------------------------|-------------------|
| The number of different substance use disorder comorbidities (ICD-10: F10-19) year before the FEP diagnosis                              | 0.131             |
| Age at FEP (years)                                                                                                                       | 0.121             |
| The total number of previous somatic (i.e., non-psychiatric) hospitalizations (two years before the FEP diagnosis)                       | 0.120             |
| Duration of the first hospitalization due to psychosis in days. The variable is set to zero for those diagnosed at an outpatient clinic. | 0.108             |
| Male gender (yes/no)                                                                                                                     | 0.073             |
| Income from work during a previous calendar year before FEP (brutto, as Kronor)                                                          | 0.057             |
| The sum of unemployment days during the previous calendar year before FEP                                                                | 0.043             |
| Has a parent with schizophrenia (ICD-10: F20 or F25) (yes/no)                                                                            | 0.041             |
| Whether the person had a specialized outpatient visit due to SUD within three months after FEP (yes/no)                                  | 0.037             |
| Family situation: Single without children (yes/no)                                                                                       | 0.034             |
| Education: university/college (i.e., >12 years) education (yes/no)                                                                       | 0.028             |
| Whether the person had a specialized outpatient visit due to psychosis within three months after FEP (yes/no)                            | 0.027             |
| Family situation: youth (<=20 years) living at home (with their parents) (yes/no)                                                        | 0.023             |
| The number of continuous days on sick leave a year before FEP                                                                            | 0.020             |
| Born in Sweden (yes/no)                                                                                                                  | 0.018             |
| Diagnosis of FEP during inpatient visit (yes/no)                                                                                         | 0.018             |
| Use of antipsychotics during 30 days after cohort entry (yes/no)                                                                         | 0.017             |
| Born outside of Europe (yes/no)                                                                                                          | 0.016             |
| Residence: densely populated city (yes/no)                                                                                               | 0.011             |
| The severity of major depressive disorder one year before FEP                                                                            | 0.010             |
| Education: only elementary level (i.e., nine years) education (yes/no)                                                                   | 0.010             |
| Residence: rural areas (yes/no)                                                                                                          | 0.009             |
| Education: high-school level (i.e., 10-12 years) education (yes/no)                                                                      | 0.008             |
| FEP diagnosis of Unspecified Psychosis, ICD-10: F29 (yes/no)                                                                             | 0.007             |
| FEP Diagnosis of Brief Psychotic Disorder, ICD-10: F23 (yes/no)                                                                          | 0.007             |
| Whether the person has visited a psychiatric hospital a year before the FEP (yes/no)                                                     | 0.007             |
| Benzodiazepines during 30 days after cohort entry (N03AE01 clonazepam, N05BA, N05CD) (yes/no)                                            | 0.007             |
| Residence: towns and suburbs (yes/no)                                                                                                    | 0.007             |
| Substance-induced psychosis year before FEP (yes/no)                                                                                     | 0.007             |
| Antidepressants during 30 days after cohort entry (N06A) (yes/no)                                                                        | 0.006             |
| Family situation: single with children (yes/no)                                                                                          | 0.005             |
| Family situation: married or cohabitant with children (yes/no)                                                                           | 0.005             |
| FEP diagnosis of Delusional Disorder, ICD-10: F22 (yes/no)                                                                               | 0.004             |
| Olanzapine oral N05AH02 during 30 days after cohort entry (yes/no)                                                                       | 0.004             |
| Family situation: married or cohabitant without children (yes/no)                                                                        | 0.004             |
| Suicide attempt (ICD-10: X60-X84, Y10-Y34) year before FEP (yes/no)                                                                      | 0.004             |
| Aripiprazole oral N05AX12 during 30 days after FEP (yes/no)                                                                              | 0.004             |
| Quetiapine oral N05AH04 during 30 days after cohort entry (yes/no)                                                                       | 0.004             |
| Any LAI during 30 days after FEP (yes/no)                                                                                                | 0.004             |
| Mood stabilizer use during 30 days after FEP (yes/no)                                                                                    | 0.004             |
| Any employment during the previous calendar year before FEP (yes/no)                                                                     | 0.003             |
| SUD drug use during 30 days after cohort entry (N07BB, N07BC) (yes/no)                                                                   | 0.003             |

|                                                                             |       |
|-----------------------------------------------------------------------------|-------|
| FEP diagnosis of Schizophrenia, ICD-10: F20 (yes/no)                        | 0.003 |
| Born in Europe (outside of Sweden) (yes/no)                                 | 0.003 |
| Personality disorder (ICD-10: F60-F69) comorbidity year before FEP (yes/no) | 0.002 |
| ADHD drug use during 30 days after FEP (yes/no)                             | 0.001 |
| FEP diagnosis of schizoaffective disorder, ICD-10: F25 (yes/no)             | 0.001 |
| FEP diagnosis of other psychotic disorder ICD-10: F28 (yes/no)              | 0.001 |
| Granted disability pension within three months of FEP (yes/no)              | 0.000 |
| FEP diagnosis of schizotypal personality, ICD-10: F21 (yes/no)              | 0.000 |
| FEP diagnosis of shared psychotic disorder, ICD-10: F24 (yes/no)            | 0.000 |

**eTable 2.** Machine Learning Classification Performances for the Prediction of Mortality Across the Study Samples

|                                                                                                                        | TP  | TN     | FP   | FN  | AUROC | Sens % | Spec% | BAC%  |
|------------------------------------------------------------------------------------------------------------------------|-----|--------|------|-----|-------|--------|-------|-------|
| <b>Two-Year Mortality Prediction:</b>                                                                                  |     |        |      |     |       |        |       |       |
| Discovery Sample (N=20,000): trained on all features (out-of-training predictions)                                     | 209 | 14,001 | 5649 | 141 | 0.71  | 59.71  | 71.25 | 65.48 |
| Discovery Sample (N=3992): restricted to those without any antipsychotic treatment during two years after baseline     | 58  | 2812   | 1095 | 27  | 0.74  | 68.24  | 71.97 | 70.10 |
| Discovery Sample (N=16,008): restricted to those with some antipsychotic treatment during two years after baseline     | 151 | 11,189 | 4554 | 114 | 0.70  | 56.98  | 71.07 | 64.03 |
| Validation sample 1 (Sweden, N=4052): Predictions using the final model (5 variables) trained in the discovery sample  | 37  | 3037   | 947  | 31  | 0.70  | 54.44  | 76.23 | 65.32 |
| Validation sample 2 (Finland, N=1490): Predictions using the final model (5 variables) trained in the discovery sample | 20  | 1051   | 408  | 11  | 0.67  | 64.52  | 72.04 | 68.28 |
| <b>15-Year Mortality Prediction:</b>                                                                                   |     |        |      |     |       |        |       |       |
| Discovery Sample (N=590): trained on all features (out-of-training predictions)                                        | 21  | 432    | 114  | 23  | 0.69  | 47.73  | 79.12 | 63.42 |
| Validation sample 1 (N=113): Predictions using the final model (5 variables) trained in the discovery sample           | 4   | 88     | 9    | 12  | 0.67  | 30.77  | 88.00 | 59.38 |
| Validation sample 2 (N=742): Predictions using the final model (5 variables) trained in the discovery sample           | 53  | 494    | 163  | 32  | 0.69  | 62.35  | 75.19 | 68.77 |
| <b>20-Year Mortality Prediction:</b>                                                                                   |     |        |      |     |       |        |       |       |
| Validation sample 2 (N=122): Predictions using the final model (5 variables) trained in the discovery sample           | 9   | 82     | 21   | 10  | 0.66  | 47.37  | 79.61 | 63.49 |

Abbreviations: TP=true positive, TN=true negative, FP=false positive, FN=false negative, AUROC=area under the receiver operating characteristic curve, Sens%=sensitivity%, Spec%=specificity%, BAC%=balanced accuracy.

**eTable 3.** Differences in the Patterns of Use of Different Oral Antipsychotics and Long-Acting Injectable Antipsychotics (LAIs; Grouped Together) Among Those Predicted to Die and to Survive in the Discovery Sample

| Treatment    | Predicted to Die |            | Predicted Survival |            | Statistical Testing                  |
|--------------|------------------|------------|--------------------|------------|--------------------------------------|
|              | Users            | Percentage | Users              | Percentage |                                      |
| Any LAI      | 914              | 15.60      | 2235               | 15.80      | $\chi^2 = 0.11$ , P-value = 0.738    |
| Aripiprazole | 1234             | 21.07      | 4201               | 29.71      | $\chi^2 = 155.83$ , P-value < 0.0001 |
| Olanzapine   | 2994             | 51.11      | 7212               | 51.00      | $\chi^2 = 1.08$ , P-value = 0.298    |
| Quetiapine   | 1391             | 23.75      | 3056               | 21.61      | $\chi^2 = 10.81$ , P-value = 0.001   |
| Risperidone  | 955              | 16.30      | 3348               | 23.67      | $\chi^2 = 132.86$ , P-value < 0.0001 |
| Polypharmacy | 2492             | 42.54      | 6416               | 45.37      | $\chi^2 = 13.30$ , P-value = 0.0003  |

Abbreviation: LAI=Long-Acting Injectable

**eTable 4.** Association Between Use vs Nonuse of Medications and Risk of Death in Between-Individual Analysis in the Swedish Discovery Sample (n = 20 000)

| Treatment           | Medication Group    | Predicted to Die |           | Predicted Survival |           |
|---------------------|---------------------|------------------|-----------|--------------------|-----------|
|                     |                     | HR               | 95%CI     | HR                 | 95%CI     |
| Any LAI             | Antipsychotic       | 0.45             | 0.23-0.88 | 0.84               | 0.50-1.40 |
| Aripiprazole        | Antipsychotic, oral | 0.77             | 0.47-1.26 | 0.38               | 0.20-0.69 |
| Olanzapine          | Antipsychotic, oral | 0.97             | 0.72-1.31 | 0.77               | 0.53-1.11 |
| Quetiapine          | Antipsychotic, oral | 1.16             | 0.77-1.73 | 0.95               | 0.59-1.53 |
| Risperidone         | Antipsychotic, oral | 0.65             | 0.35-1.21 | 0.38               | 0.18-0.82 |
| Polypharmacy        | Antipsychotic, oral | 0.83             | 0.59-1.18 | 1.02               | 0.73-1.44 |
|                     |                     |                  |           |                    |           |
| Any Mood Stabilizer | Mood Stabilizer     | 0.64             | 0.46-0.90 | 1.03               | 0.75-1.40 |
|                     |                     |                  |           |                    |           |
| Any Antidepressant  | Antidepressant      | 1.22             | 1.00-1.49 | 1.06               | 0.84-1.34 |
|                     |                     |                  |           |                    |           |
| Any Benzodiazepine  | Benzodiazepine      | 1.79             | 1.45-2.21 | 2.16               | 1.66-2.81 |

Abbreviations: HR=Hazard Ratio, 95% CI=95% Confidence Interval and LAI=Long-Acting Injectable

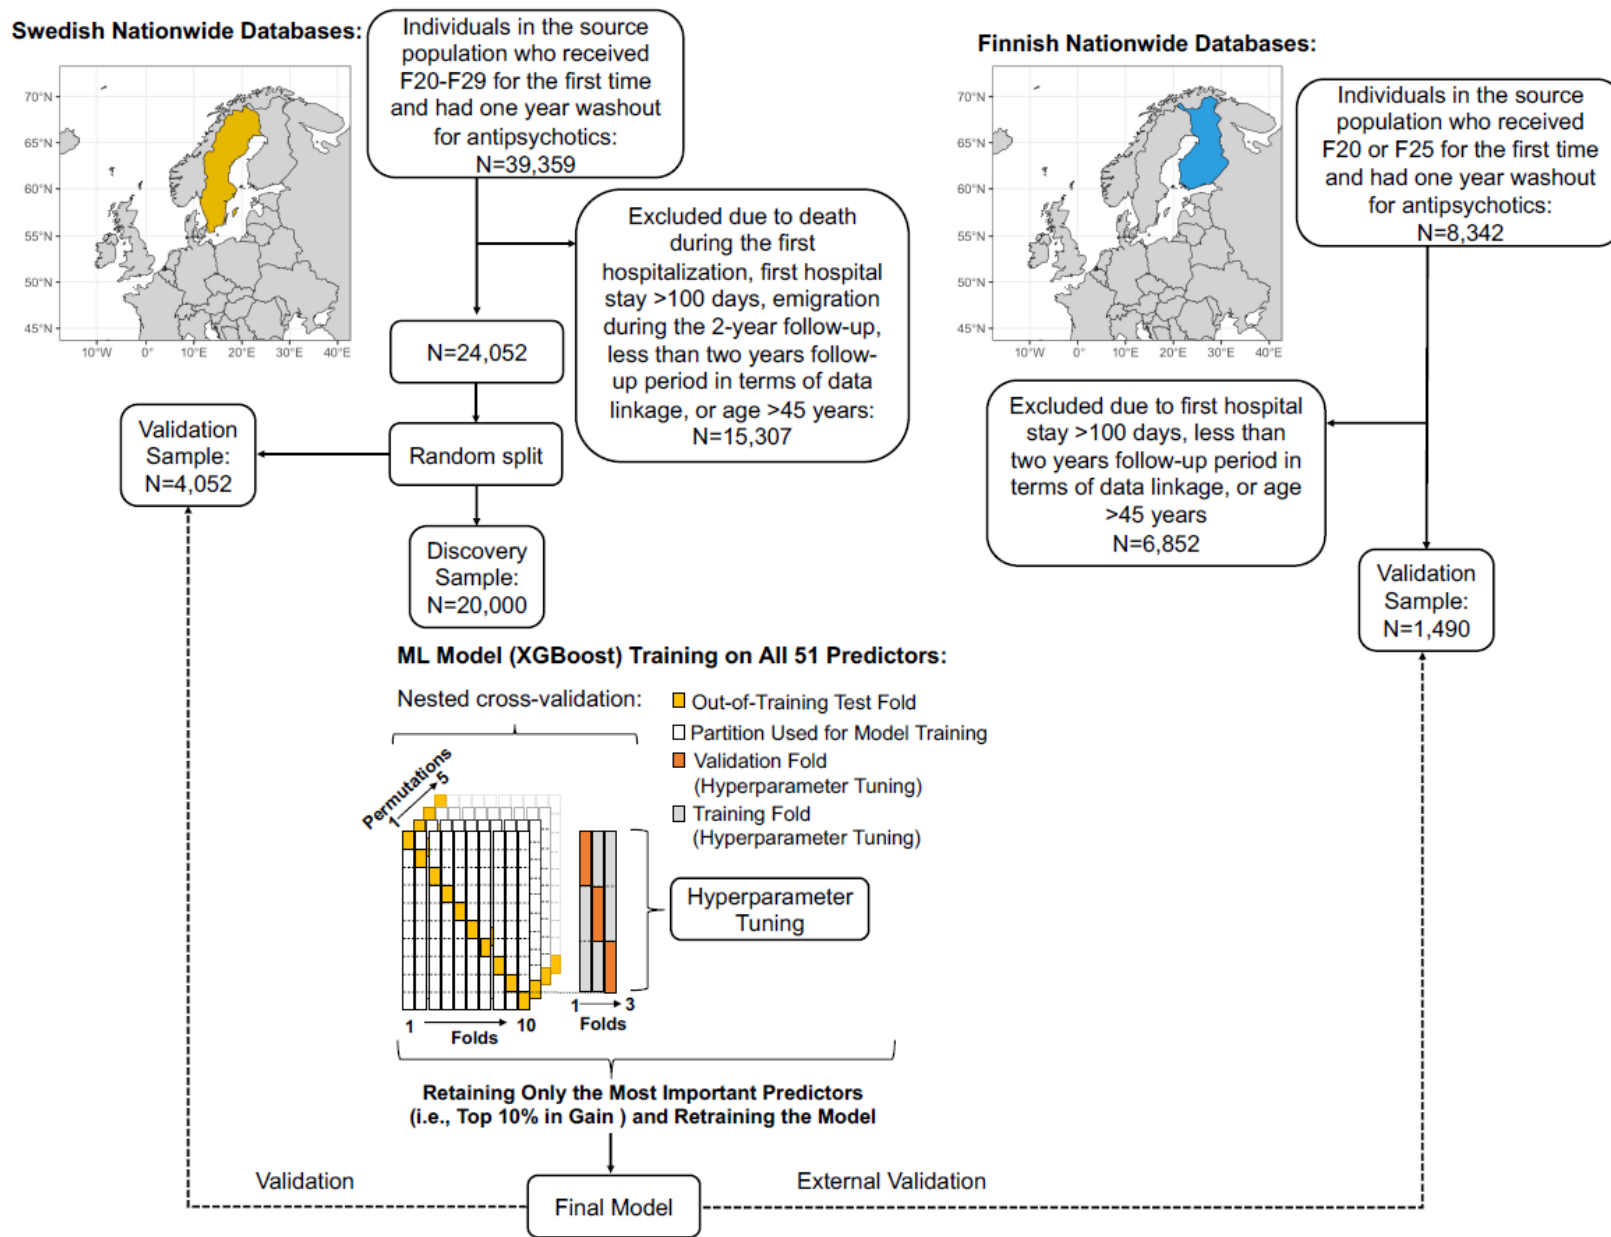

**eFigure 1.** Flowchart Depicting the Model Development and Validation Analyses in the Present Study



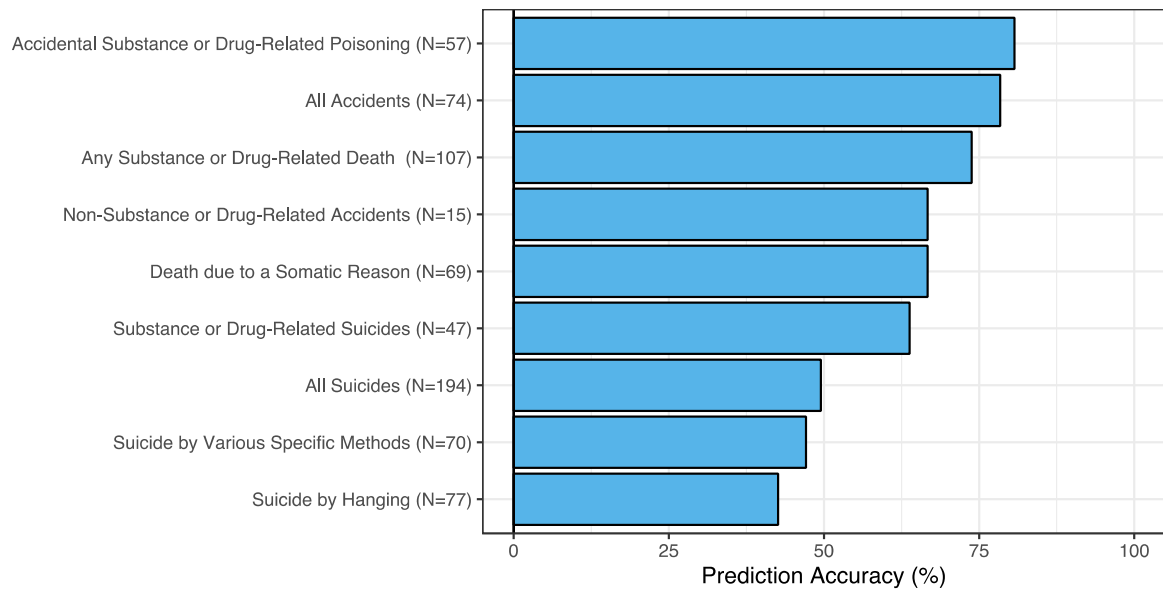

**eFigure 2.** Proportion of Correct Out-of-Training Predictions Among Different Causes of Death in the Discovery Sample

Accidental Substance or Drug-Related Poisonings (ICD-10 codes: X40-X45), All Accidents (V01-V99, W00-W99, X00-X59), Any Substance or Drug-Related Death (F10-F19, X40-X45, X60-X65, Y10-Y15), Non-Substance or Drug-Related Accidents (V01-V99, W00-99, X46-X59), Death due to a Somatic Reason (A00-R99, except for F00-F99 diagnoses), Substance or Drug-Related Suicides (X60-X65, Y10-Y15), All Suicides (X60-X84, Y10-Y34), Suicide by Various Specific Methods (X66-X69, X71-X84, Y10-Y19, Y21-Y34) and Suicide by Hanging (X70 and Y20).

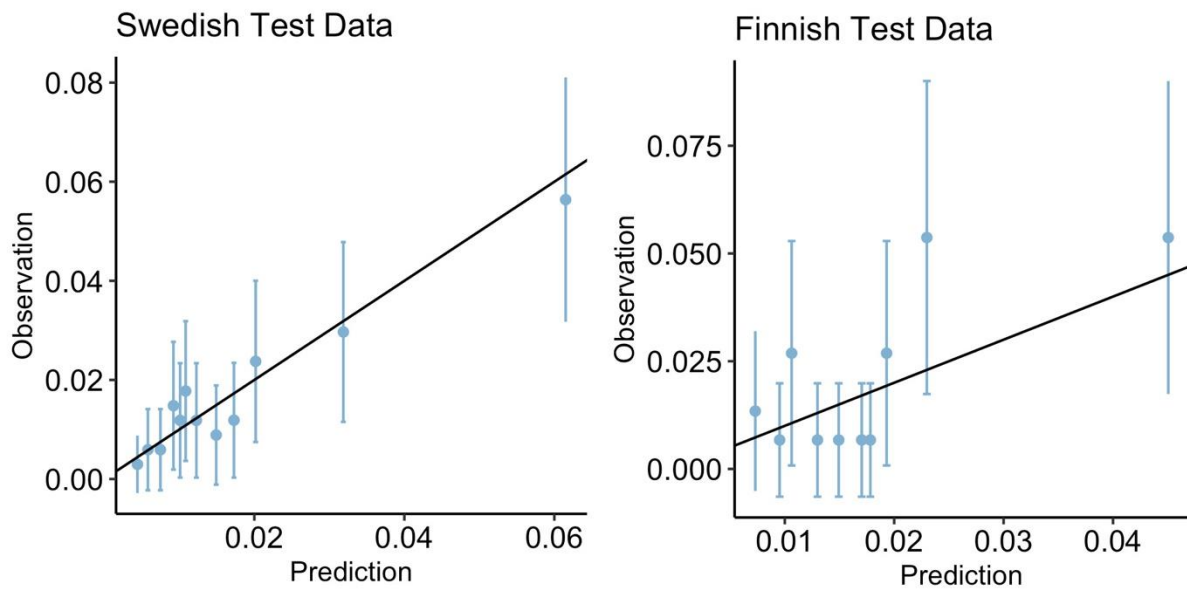

**eFigure 3.** Calibration Plots for the Model Predictions in the 2 Validation Samples

Calibrations were conducted using Platt scaling (logistic regression). The calibration model was trained in the discovery sample and applied to Swedish and Finnish validation samples. Calibration performance for the Swedish validation sample (Brier score=0.016, intercept=-0.149, slope=0.966) and the Finnish validation sample (Brier score=0.020, intercept=0.048, slope=0.970).

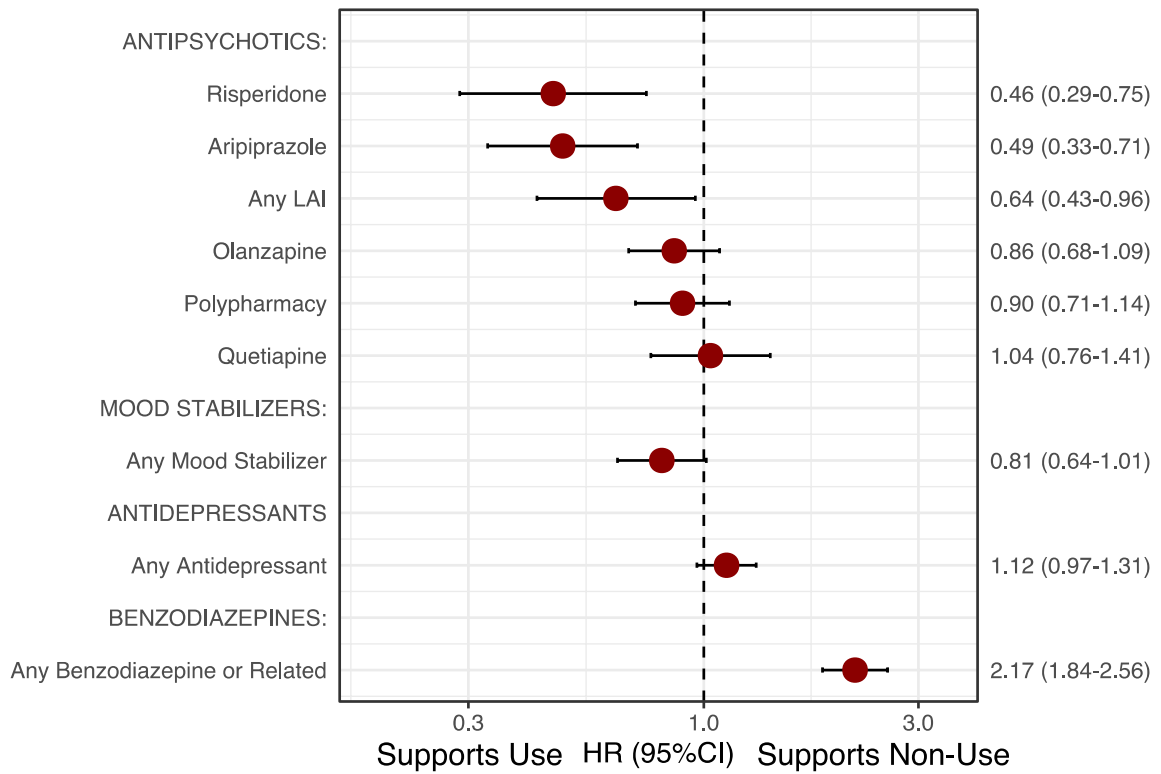

**eFigure 4.** Association of Different Pharmacotherapies and the Risk of Death in the Discovery Sample (n = 20 000) Without Machine Learning–Based Stratification

Antipsychotics are oral except for "any LAI," which includes all long-acting injectable antipsychotics.
